# Supplementary material for: Eosinophils, basophils and type 2 immune microenvironments in COPD-affected lung tissue
Source: PubMed Central journal article supplement — Eur Respir J. 2020 May 7;55(5):1900110. doi: 10.1183/13993003.00110-2019 (PMC7236868; doi:10.1183/13993003.00110-2019), 2020-05-07
Supplement: ERJ-00110-2019.Shareable.pdf [file ERJ-00110-2019.Shareable.pdf]

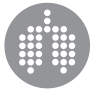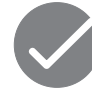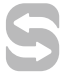

SHAREABLE PDF

# Eosinophils, basophils and type 2 immune microenvironments in COPD-affected lung tissue

Prajakta Jogdand<sup>1</sup>, Premkumar Siddhuraj<sup>1</sup>, Michiko Mori<sup>1</sup>, Caroline Sanden<sup>1,2</sup>, Jimmie Jönsson<sup>2</sup>, Andrew F. Walls<sup>3</sup>, Jennifer Kearley<sup>4</sup>, Alison A. Humbles<sup>4</sup>, Roland Kolbeck<sup>4</sup>, Leif Bjermer<sup>5</sup>, Paul Newbold<sup>6</sup> and Jonas S. Erjefält<sup>1,5</sup>

**Affiliations:** <sup>1</sup>Dept of Experimental Medical Science, Lund University, Lund, Sweden. <sup>2</sup>Medetect AB, Lund, Sweden. <sup>3</sup>Clinical and Experimental Sciences, University of Southampton, Southampton General Hospital, Southampton, UK. <sup>4</sup>Dept of Respiratory, Inflammation and Autoimmunity, AstraZeneca, Gaithersburg, MD, USA. <sup>5</sup>Dept of Respiratory Medicine and Allergology, Lund University, Lund, Sweden. <sup>6</sup>Dept of Translational Sciences, AstraZeneca, Gaithersburg, MD, USA.

**Correspondence:** Jonas S. Erjefält, Unit of Airway Inflammation, BMC D12, Lund University, SE-221 84, Lund, Sweden. E-mail: [jonas.erjefalt@med.lu.se](mailto:jonas.erjefalt@med.lu.se)

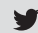

@ERSpublications

**Highly localised Th2- and eosinophil-rich pockets were identified in COPD-affected lungs, which increased in number with increasing disease severity and included basophils. This exemplifies a novel type of heterogeneity in the immunopathology of COPD.** <http://bit.ly/2HexTco>

**Cite this article as:** Jogdand P, Siddhuraj P, Mori M, *et al.* Eosinophils, basophils and type 2 immune microenvironments in COPD-affected lung tissue. *Eur Respir J* 2020; 55: 1900110 [<https://doi.org/10.1183/13993003.00110-2019>].

This single-page version can be shared freely online.

**ABSTRACT** Although elevated blood or sputum eosinophils are present in many patients with COPD, uncertainties remain regarding the anatomical distribution pattern of lung-infiltrating eosinophils. Basophils have remained virtually unexplored in COPD. This study mapped tissue-infiltrating eosinophils, basophils and eosinophil-promoting immune mechanisms in COPD-affected lungs.

Surgical lung tissue and biopsies from major anatomical compartments were obtained from COPD patients with severity grades Global Initiative for Chronic Obstructive Lung Disease stages I–IV; never-smokers/smokers served as controls. Automated immunohistochemistry and *in situ* hybridisation identified immune cells, the type 2 immunity marker GATA3 and eotaxins (CCL11, CCL24).

Eosinophils and basophils were present in all anatomical compartments of COPD-affected lungs and increased significantly in very severe COPD. The eosinophilia was strikingly patchy, and focal eosinophil-rich microenvironments were spatially linked with GATA3<sup>+</sup> cells, including type 2 helper T-cell lymphocytes and type 2 innate lymphoid cells. A similarly localised and interleukin-33/ST2-dependent eosinophilia was demonstrated in influenza-infected mice. Both mice and patients displayed spatially confined eotaxin signatures with CCL11<sup>+</sup> fibroblasts and CCL24<sup>+</sup> macrophages.

In addition to identifying tissue basophilia as a novel feature of advanced COPD, the identification of spatially confined eosinophil-rich type 2 microenvironments represents a novel type of heterogeneity in the immunopathology of COPD that is likely to have implications for personalised treatment.
